# Supplementary material
Source: Springer Nature journal article supplement (https://www.springermedizin.de/resource/supplementary/12933_2011_344_MOESM3_ESM.pdf/9538206)

## Syndecan-4 SM

**A**

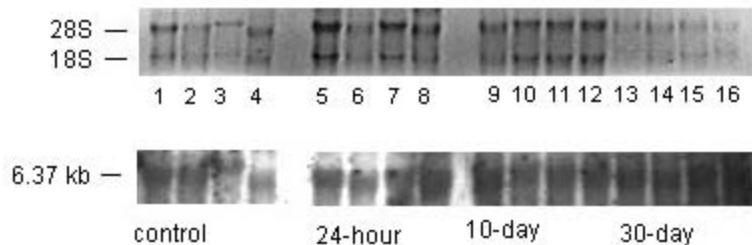

**B**

## Syndecan-4

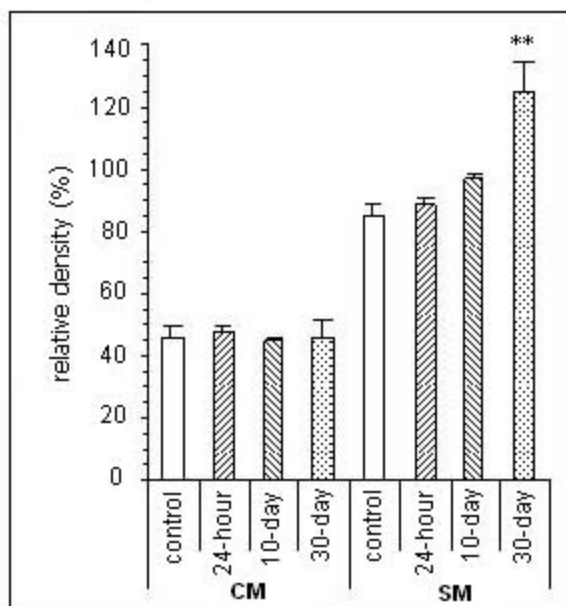

Supplement: MOESM3 [file 9538206]
